# Supplementary material for: Synthesis and biological evaluation of spongistatin/altohyrtin analogues: E-ring dehydration and C46 side-chain truncationElectronic supplementary information (ESI) available: spectroscopic data for compounds 2 and 3. See http://www.rsc.org/suppdata/cc/b2/b212651f/
Source: Royal Society of Chemistry journal article supplement (doi:10.1039/b212651f), 2003-01-23
Supplement: b212651f.doc [file b212651f.doc]

**Supplementary data**

**Synthesis and biological evaluation of spongistatin/altohyrtin analogues: E-ring dehydration and C46 side-chain truncation**

**Ian Paterson,* Jose L. Aceña, Jordi Bach, David Y.-K. Chen and Mark J. Coster**

*University Chemical Laboratory, Lensfield Road, Cambridge CB2 1EW, UK. Fax: +44 1223 336362; Tel: +44 1223 336407; E-mail: ip100@cam.ac.uk*

**E-ring dehydration analogue 2**

**Rf** 0.20 (5:95 MeOH/CH2Cl2); **Reverse phase HPLC Rt** 19.4 min (27.5:72.5 H2O/MeOH); +5.8 (*c* 0.22, MeOH); **IR** (liquid film) 3450, 2936, 1733, 1649, 1382, 1256, 1169, 1088 cm-1; **1H NMR** (500 MHz, CD3CN):  6.42 (1H, dd, *J* = 14.9, 1.1 Hz, 49-CH), 6.14 (1H, dd, *J* = 14.9, 5.4 Hz, 48-CH), 5.92 (1H, dd, *J* = 10.0, 5.5 Hz, 35-CH), 5.86 (1H, dd, *J* = 10.1, 0.8 Hz, 34-CH), 5.46 (1H, br s, 51-CHaHb), 5.41 (1H, m, 29-CH), 5.36 (1H, br s, 51-CHaHb), 5.35 (1H, br t, *J* = 11.0 Hz, 28-CH), 5.19 (1H, dd, *J* = 10.6, 1.6 Hz, 15-CH), 4.99 (1H, m, 27-CH), 4.94 (1H, br s, 5-CH), 4.90 (1H, br s, 45-C=CHaHb), 4.89 (1H, br s, 45-C=CHaHb), 4.84 (2H, br s, 13-C=CH2), 4.79 (1H, dd, *J* = 11.0, 9.2 Hz, 41-CH), 4.48 (1H, br t, *J* = 11.3 Hz, 11-CH), 4.41 (1H, d, *J* = 10.5 Hz, 25-OH), 4.35 (1H, m, 47-CH), 4.27 (1H, br t, *J* = 11.3 Hz, 3-CH), 4.02 (1H, br t, *J* = 11.1 Hz, 19-CH), 3.94 (1H, br m, 25-CH), 3.90 (1H, d, *J* = 5.0 Hz, 42-OH), 3.88 (1H, br d, *J* = 10.4 Hz, 33-CH), 3.82 (1H, d, *J* = 10.3 Hz, 39-CH), 3.49 (2H, m, 43-CH + 21-CH), 3.30 (1H, d, *J* = 10.5 Hz, 38-CH), 3.27 (3H, s, 21-OCH3), 3.23 (1H, d, *J* = 5.0 Hz, 47-OH), 3.17 (1H, td, *J* = 9.0, 4.9 Hz, 42-CH), 3.04 (1H, dq, *J* = 10.8, 7.0 Hz, 16-CH), 2.91 (1H, d, *J* = 10.8 Hz, 38-OH), 2.89 (1H, m, 14-CH), 2.83 (1H, dd, *J* = 19.4, 10.0 Hz, 18-CHaHb), 2.77 (1H, br d, *J* = 13.9 Hz, 44-CHaHb), 2.62 (1H, br d, *J* = 18.1 Hz, 18-CHaHb), 2.59 (1H, dd, *J* = 16.5, 1.6 Hz, 2-CHaHb), 2.51 (1H, dd, *J* = 16.5, 10.5 Hz, 2-CHaHb), 2.31 (3H, m, 46-CHaHb + 24-CHaHb + 12-CHaHb), 2.20 (1H, dd, *J* = 13.7, 6.1 Hz, 46-CHaHb), 2.03-2.12 (5H, m, 12-CHaHb + 20-CHaHb + 22-CHaHb + 30-CHaHb + 44-CHaHb), 1.98 (3H, s, COCH3), 1.94 (2H, m, 34-CH + 40-CH), 1.85 (3H, s, COCH3), 1.80 (2H, m, 4-CHaHb + 30-CHaHb), 1.67 (2H, m, 4-CHaHb + 6-CHaHb), 1.54-1.59 (7H, m, 6-CHaHb + 8-CHaHb + 10-CHaHb + 24-CHaHb + 26-CH2 + 31-CHaHb), 1.47 (2H, m, 8-CHaHb + 32-CHaHb), 1.28 (1H, m, 10-CHaHb), 1.21 (2H, m, 31-CHaHb + 32-CHaHb), 1.18 (3H, d, *J* = 6.9 Hz, 16-CHCH3), 1.09 (1H, t, *J* = 12.1 Hz, 22-CHaHb), 1.06 (3H, s, 9-CCH3), 1.00 (3H, d, *J* = 6.9 Hz, 14-CHCH3), 0.91 (1H, ddd, *J* = 11.9, 11.9, 11.9 Hz, 20-CHaHb), 0.91 (3H, d, *J* = 7.0 Hz, 34-CHCH3), 0.77 (3H, d, *J* = 6.7 Hz, 40-CHCH3); **13C NMR** (125 MHz, CD3CN):  213.0, 172.9, 171.5, 170.0, 148.1, 143.9, 139.1, 139.0, 134.4, 133.0, 131.7, 127.6, 126.8, 116.3, 116.3, 114.6, 99.8, 99.2, 95.8, 81.3, 80.2, 78.6, 75.1, 73.8, 73.2, 72.6, 71.1, 70.3, 69.0, 67.0, 66.0, 64.5, 64.1, 62.4, 61.3, 55.6, 51.7, 47.3, 46.9, 45.0, 44.3, 44.1, 43.9, 40.6, 40.0, 39.3, 38.2, 37.6, 37.2, 36.4, 34.7, 34.4, 33.4, 32.3, 30.1, 27.9, 26.5, 21.7, 20.9, 13.7, 13.7, 12.6, 12.0; **HRMS** (+ESI) Calc. for C63H93ClO20Na [M + Na]+: 1227.5839, found: 1227.5841.

**C46 Side-chain truncate 3**

**Rf** 0.24 (5:95 MeOH/CH2Cl2); **1H NMR** (500 MHz, CD3CN):  5.47 (1H, m, 29-CH), 5.36 (1H, br t, *J* = 9.7 Hz, 28-CH), 5.18 (1H, dd, *J* = 10.6, 1.8 Hz, 15-CH), 5.00 (1H, m, 27-CH), 4.94 (1H, br s, 5-CH), 4.85 (2H, br s, 13-C=CH2), 4.84 (1H, br s, 45-C=CHaHb), 4.77 (1H, dd, *J* = 11.0, 9.2 Hz, 41-CH), 4.74 (2H, br s, 45-C=CHaHb + 37-OH), 4.35 (1H, br t, *J* = 11.0 Hz, 11-CH), 4.29 (1H, d, *J* = 10.7 Hz, 25-OH), 4.26 (1H, br s, 9-OH), 4.26 (1H, obsc., 3-CH), 4.19 (1H, br d, *J* = 5.2 Hz, 42-OH), 4.16 (1H, m, 33-CH), 4.02 (1H, br t, *J* = 11.1 Hz, 19-CH), 3.92 (1H, m, 25-CH), 3.82 (1H, d, *J* = 9.3 Hz, 35-OH), 3.74 (1H, br d, *J* = 10.4 Hz, 39-CH), 3.66 (1H, m, 35-CH), 3.49 (1H, m, 21-CH), 3.38 (1H, obsc., 43-CH), 3.37 (1H, d, *J* = 10.7 Hz, 38-CH), 3.27 (3H, s, 21-OCH3), 3.14 (1H, td, *J* = 9.1, 5.2 Hz, 42-CH), 3.04 (1H, dq, *J* = 10.7, 6.9 Hz, 16-CH), 2.82-2.90 (3H, m, 14-CH + 18-CHaHb + 38-OH), 2.61-2.65 (2H, m, 18-CHaHb + 44-CHaHb), 2.56 (1H, dd, *J* = 16.7, 1.8 Hz, 2-CHaHb), 2.49 (1H, dd, *J* = 16.7, 10.5 Hz, 2-CHaHb), 2.29 (2H, m, 24-CHaHb + 12-CHaHb), 2.14 (3H, obsc., 45-CCH3), 2.04-2.10 (4H, m, 12-CHaHb + 30-CH2 + 44-CHaHb), 1.90-1.99 (3H, m, 20-CHaHb + 22-CHaHb + 36-CHaHb), 1.85 (3H, s, COCH3), 1.73 (3H, s, COCH3), 1.68 (1H, m, 4-CHaHb), 1.54-1.62 (9H, m, 4-CHaHb + 8-CHaHb + 10-CHaHb + 24-CHaHb + 26-CH2 + 31-CHaHb + 34-CH + 36-CHaHb), 1.48 (1H, d, *J* = 14.0 Hz, 8-CHaHb), 1.41 (1H, m, 32-CHaHb), 1.27-1.32 (3H, m, 10-CHaHb + 31-CHaHb + 32-CHaHb), 1.17 (3H, d, *J* = 7.0 Hz, 16-CHCH3), 1.11 (1H, t, *J* = 11.9 Hz, 22-CHaHb), 1.07 (3H, s, 9-CCH3), 1.04 (3H, d, *J* = 6.9 Hz, 14-CHCH3), 0.96 (1H, ddd, *J* = 12.0, 12.0, 12.0 Hz, 20-CHaHb), 0.85 (3H, d, *J* = 7.2 Hz, 34-CHCH3), 0.77 (3H, d, *J* = 6.7 Hz, 40-CHCH3); **HRMS** (+ESI) Calc. for C58H90O20Na [M + Na]+: 1129.5811, found: 1129.5918.
